# Supplementary material for: Urinary mRNA-based biomarkers for non-muscle-invasive bladder cancer: a mini-review
Source: PubMed Central journal article supplement (PMC11341357; doi:10.3389/fonc.2024.1441883), 2024-08-09
Supplement: DataSheet_1.pdf [file DataSheet_1.pdf]

Pubmed search: "biomarkers" AND "bladder cancer" AND "urine" and "RNA" and "non-muscle"

n= 29 articles

Exclusion criteria:  
1) No RNA urinary-based biomarkers  
2) No access

Original research  
(n=11)

n= 16 articles

Systematic or literature review  
(n=5)

Original research  
(n =25)

Exclusion criteria:  
1) No RNA urinary-based biomarkers  
2) No access  
3) Articles included previously

Original research reviewed  
(n=22)

Included original research  
(n =11)

mRNA-based Biomarkers  
(n=11)
